# Supplementary material for: Age-dependent pathogenic characteristics of SARS-CoV-2 infection in ferrets
Source: Research Square preprint supplement (doi:10.21203/rs.3.rs-131380/v1), 2021-01-04
Supplement: Supplementary file 1 [file 997a66b4996de9be905a16d4.pdf]

**Table 1. Clinical scores of ferrets infected with SARS-CoV-2**

| Group                             |                    | 0dpi | 2dpi      | 4dpi      | 6dpi      | 8dpi      | 10dpi     |
|-----------------------------------|--------------------|------|-----------|-----------|-----------|-----------|-----------|
| <b>G1</b><br><b>(Juvenile)</b>    | Cough              | 0.00 | 0.00      | 0.00      | 0.00      | 0.00      | 0.00      |
|                                   | Runny nose         | 0.00 | 0.56±0.50 | 0.33±0.47 | 0.00      | 0.00      | 0.00      |
|                                   | Movement, activity | 0.00 | 0.44±0.50 | 0.17±0.37 | 0.00      | 0.00      | 0.00      |
|                                   | Total              | 0.00 | 1.00      | 0.50      | 0.00      | 0.00      | 0.00      |
| <b>G2</b><br><b>(Young adult)</b> | Cough              | 0.00 | 0.33±0.47 | 1.00      | 0.83±0.37 | 0.00      | 0.00      |
|                                   | Runny nose         | 0.00 | 0.22±0.42 | 1.33±0.47 | 1.17±0.37 | 0.00      | 0.00      |
|                                   | Movement, activity | 0.00 | 0.67±0.67 | 1.83±0.37 | 1.83±0.37 | 1.00      | 0.00      |
|                                   | Total              | 0.00 | 1.22      | 4.17      | 3.83      | 1.00      | 0.00      |
| <b>G3</b><br><b>(Aged adult)</b>  | Cough              | 0.00 | 0.44±0.50 | 1.00      | 0.83±0.37 | 0.00      | 0.00      |
|                                   | Runny nose         | 0.00 | 0.44±0.68 | 1.50±0.50 | 1.50±0.50 | 0.67±0.47 | 0.33±0.47 |
|                                   | Movement, activity | 0.00 | 0.78±0.92 | 2.00      | 1.83±0.37 | 1.00      | 0.67±0.47 |
|                                   | Total              | 0.00 | 1.67      | 4.50      | 4.00      | 1.75      | 1.00      |

Observational clinical symptoms: Cough, rhinorrhea, movement, and activity.

Score: 0; normal, 1: occasional, mild reduced activity, 2: frequent, reduced activity.

\* Scores were measured by observation of clinical symptoms for at least 20 minutes in each group of ferrets based on the following criteria: Cough: 0; no evidence of cough, 1; occasional cough, 2; frequent cough (score 2).

Rhinorrhea: 0; no nasal rattling or sneezing, 1; moderate nasal discharge on external nares, 2; severe nasal discharge on external nares.

Movement, activity: 0; normal movement and activity, 1; mild reduced movement and activity, 2; evidence of reduced movement and activity.
