# Supplementary material for: Age-dependent pathogenic characteristics of SARS-CoV-2 infection in ferrets
Source: Research Square preprint supplement (doi:10.21203/rs.3.rs-131380/v1), 2021-01-04
Supplement: Supplementary file 2 [file ce219de68401e1e2b554dc4a.pdf]

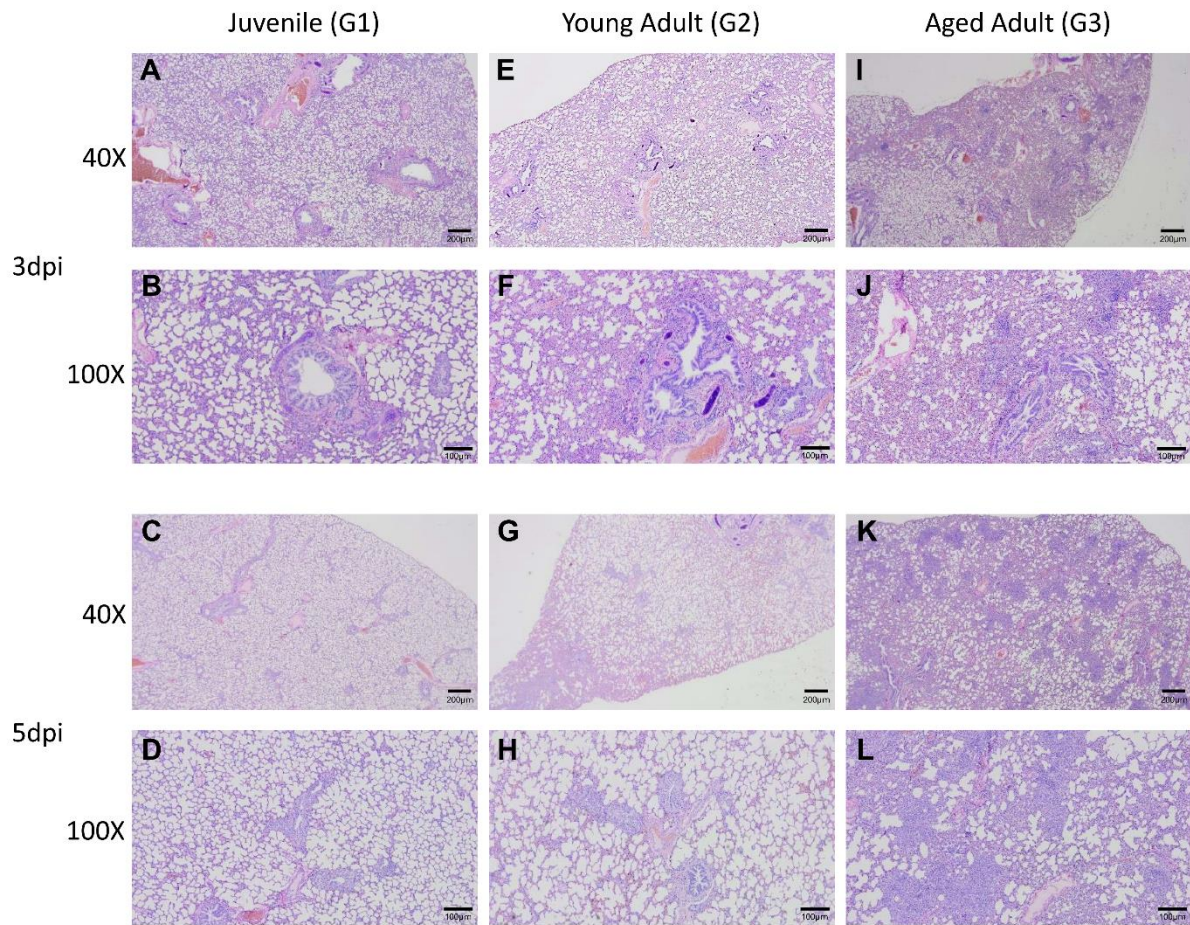

**Supplementary Fig. 1.** Histopathology of lungs from SARS-CoV-2 infected ferret groups. Ferrets were inoculated with  $10^{5.8}$  TCID<sub>50</sub> of NMC-nCoV02 virus. Lung tissues were harvested on days 3 and 5 post-inoculation. Histopathological lung regions were compared among the different age groups of ferrets: (A-D) juvenile (less than 6 months, G1 group), (E-H) young adults (1 to 2 years, G2 group), and (I-L) aged ferrets (older than 3 years). Magnification x40 and scale bar 200µm (A, C, E, G, I, and K). Magnification x100 and scale bar 100µm (B, D, F, H, J, and L).
